# Supplementary material for: Trophic Chain Organochlorine Pesticide Contamination in a Highly Productive Upwelling Area in Southeastern Brazil
Source: MDPI journal article supplement (doi:10.3390/ijerph20146343), 2023-07-11
Supplement: s1 [file s1]

# TROPHIC CHAIN ORGANOCHLORINE CONTAMINATION IN A HIGHLY PRODUCTIVE UPWELLING AREA IN SOUTHEASTERN BRAZIL

<sup>1</sup>Ricardo Lavandier, <sup>2</sup>Jennifer Arêas, <sup>3</sup>Leila Lemos, <sup>4</sup>Jailson de Moura, <sup>5</sup>Satie Taniguchi, <sup>5</sup>Rosalinda Montone, <sup>6,7</sup>Natalia Quinete, <sup>8</sup>Rachel Ann Hauser-Davis, <sup>9</sup>Salvatore Siciliano, <sup>1</sup>Isabel Moreira

<sup>1</sup>Departamento de Química, Pontifícia Universidade Católica do Rio de Janeiro (PUC-Rio), Rua Marquês de São Vicente, 225, Gávea – Rio de Janeiro, RJ 22453-900, Brazil

<sup>2</sup> PIBIC/Fiocruz, Av. Brasil, 4.365, Manguinhos, Rio de Janeiro, RJ 21040-900, Brazil

<sup>3</sup>Institute of Environment, Florida International University, Miami, FL, USA

<sup>4</sup> Systems Ecology, Leibniz Center for Tropical Marine Ecology (ZMT), Fahrenheitstrasse 6, 28359 Bremen, Germany

<sup>5</sup>Instituto Oceanográfico, Universidade de São Paulo (USP), Praça do Oceanográfico 191, Butantã, São Paulo, SP 05508-900, Brazil

<sup>6</sup> Institute of Environment, Florida International University, Miami, FL, USA

<sup>7</sup> Department of Chemistry and Biochemistry, Florida International University, 11200 SW 8th Street, Miami, FL 33199, USA

<sup>8</sup> Laboratório de Avaliação e Promoção da Saúde Ambiental, Instituto Oswaldo Cruz, Fundação Oswaldo Cruz, Av. Brasil, Rio de Janeiro, Manguinhos 4365, Brazil

<sup>9</sup> Departamento de Ciências Biológicas, Escola Nacional de Saúde Pública/Fiocruz Av. Brasil, 4.365, Manguinhos, Rio de Janeiro, RJ 21040-900, Brazil

## Supplementary Information:

**Table S1.** Morphometric and collection information for *Pontoporia blainvillei* individuals

**Table S2.** Morphometric and collection information for fish species and squid

**Table S3.** Method detection limits (MDLs) and method quantification limits (MQLs) in ng g<sup>-1</sup> wet weight for all analyzed organochlorinated pesticides (OCPs)

**Table S4.** Average concentrations and range in muscle and liver samples of *Pontoporia blainvillei* (n=9)

**Table S1.** Morphometric and collection information for *Pontoporia blainvillei* individuals

| Sample ID | Length (cm) | Sex    | Collection Location | Collection Status  | Date      |
|-----------|-------------|--------|---------------------|--------------------|-----------|
| PB01      | 144         | Female | Sao Joao da Barra   | accidental capture | 7/30/2011 |
| PB02      | 125         | Female | Sao Joao da Barra   | accidental capture | 1/16/2012 |
| PB03      | 144         | Female | Sao Joao da Barra   | stranded           | 1/24/2012 |
| PB04      | 136         | Male   | Quissama            | stranded           | 2/9/2012  |
| PB05      | 122         | Male   | Quissama            | stranded           | 7/9/2012  |
| PB06      | 113         | Female | Quissama            | stranded           | 8/28/2012 |
| PB07      | 115         | Male   | Quissama            | accidental capture | 8/31/2012 |
| PB08      | 102         | Female | Quissama            | accidental capture | 9/23/2012 |
| PB09      | 107         | Male   | Quissama            | accidental capture | 9/25/2012 |

**Table S2.** Morphometric and collection information for fish species and squid

| Species                       | Sample ID | Length (cm) | Sex    | Collection Location | Date      |
|-------------------------------|-----------|-------------|--------|---------------------|-----------|
| <i>Trichiurus lepturus</i>    | PE01      | 117         | female | Cabo Frio           | 8/14/2012 |
|                               | PE02      | 148         | female | Cabo Frio           | 8/14/2012 |
|                               | PE03      | 121         | female | Cabo Frio           | 8/14/2012 |
|                               | PE04      | 118         | male   | Cabo Frio           | 8/14/2012 |
|                               | PE05      | 133         | female | Cabo Frio           | 8/14/2012 |
|                               | PE06      | 119         | female | Cabo Frio           | 8/14/2012 |
|                               | PE07      | 115         | female | Cabo Frio           | 8/14/2012 |
|                               | PE08      | 108         | female | Cabo Frio           | 8/14/2012 |
|                               | PE09      | 136         | female | Cabo Frio           | 8/14/2012 |
|                               | PE10      | 140         | female | Cabo Frio           | 8/14/2012 |
|                               | PE11      | 105         | female | Cabo Frio           | 8/14/2012 |
|                               | PE12      | 119         | male   | Cabo Frio           | 8/14/2012 |
| <i>Micropogonias furnieri</i> | C01       | 48          | female | Cabo Frio           | 8/15/2012 |
|                               | C02       | 53          | female | Cabo Frio           | 8/15/2012 |
|                               | C03       | 50          | female | Cabo Frio           | 8/15/2012 |
|                               | C04       | 47          | male   | Cabo Frio           | 8/15/2012 |
|                               | C05       | 50          | female | Cabo Frio           | 8/15/2012 |
|                               | C06       | 57          | female | Cabo Frio           | 8/15/2012 |
|                               | C07       | 49          | female | Cabo Frio           | 8/15/2012 |
|                               | C08       | 53          | female | Cabo Frio           | 8/15/2012 |
|                               | C09       | 47          | female | Cabo Frio           | 8/15/2012 |
| <i>Mugil liza</i>             | T01       | 56          | female | Cabo Frio           | 8/15/2012 |
|                               | T02       | 54          | female | Cabo Frio           | 8/15/2012 |

|                                |       |    |        |            |           |
|--------------------------------|-------|----|--------|------------|-----------|
|                                | T03   | 55 | male   | Cabo Frio  | 8/15/2012 |
|                                | T04   | 60 | female | Cabo Frio  | 8/15/2012 |
|                                | T05   | 58 | female | Cabo Frio  | 8/15/2012 |
|                                | T06   | 50 | male   | Cabo Frio  | 8/15/2012 |
|                                | T07   | 54 | female | Cabo Frio  | 8/15/2012 |
|                                | T08   | 57 | female | Cabo Frio  | 8/15/2012 |
|                                | T09   | 57 | female | Cabo Frio  | 8/15/2012 |
|                                | T10   | 54 | male   | Cabo Frio  | 8/15/2012 |
| <i>Sardinella brasiliensis</i> | S01   | 24 | N/A    | Praia Seca | 9/24/2013 |
|                                | S02   | 24 | N/A    | Praia Seca | 9/24/2013 |
|                                | S03   | 25 | N/A    | Praia Seca | 9/24/2013 |
|                                | S04   | 26 | N/A    | Praia Seca | 9/24/2013 |
|                                | S05   | 25 | N/A    | Praia Seca | 9/24/2013 |
|                                | S06   | 24 | N/A    | Praia Seca | 9/24/2013 |
|                                | S07   | 25 | N/A    | Praia Seca | 9/24/2013 |
|                                | S08   | 24 | N/A    | Praia Seca | 9/24/2013 |
|                                | S09   | 24 | N/A    | Praia Seca | 9/24/2013 |
|                                | S10   | 25 | N/A    | Praia Seca | 9/24/2013 |
| <i>Scomber japonicus</i>       | CAV01 | 31 | N/A    | Praia Seca | 9/25/2013 |
|                                | CAV02 | 32 | N/A    | Praia Seca | 9/25/2013 |
|                                | CAV03 | 30 | N/A    | Praia Seca | 9/25/2013 |
|                                | CAV04 | 28 | N/A    | Praia Seca | 9/25/2013 |
|                                | CAV05 | 27 | N/A    | Praia Seca | 9/25/2013 |
|                                | CAV06 | 30 | N/A    | Praia Seca | 9/25/2013 |
|                                | CAV07 | 31 | N/A    | Praia Seca | 9/25/2013 |
|                                | CAV08 | 30 | N/A    | Praia Seca | 9/25/2013 |
|                                | CAV09 | 27 | N/A    | Praia Seca | 9/25/2013 |
|                                | CAV10 | 29 | N/A    | Praia Seca | 9/25/2013 |
| <i>Logigo plei</i>             | L01   | 36 | N/A    | Cabo Frio  | 8/15/2012 |
|                                | L02   | 33 | N/A    | Cabo Frio  | 8/15/2012 |
|                                | L03   | 42 | N/A    | Cabo Frio  | 8/15/2012 |
|                                | L04   | 37 | N/A    | Cabo Frio  | 8/15/2012 |
|                                | L05   | 41 | N/A    | Cabo Frio  | 8/15/2012 |
|                                | L06   | 37 | N/A    | Cabo Frio  | 8/15/2012 |
|                                | L07   | 34 | N/A    | Cabo Frio  | 8/15/2012 |
|                                | L08   | 42 | N/A    | Cabo Frio  | 8/15/2012 |
|                                | L09   | 39 | N/A    | Cabo Frio  | 8/15/2012 |
|                                | L10   | 38 | N/A    | Cabo Frio  | 8/15/2012 |

**Table S3.** Method detection limits (MDLs) and method quantification limits (MQLs) in ng g<sup>-1</sup> wet weight for all analyzed organochlorinated pesticides (OCPs)

| OCPs                 | MDL   | MQL  |
|----------------------|-------|------|
| α-HCH                | 0.310 | 1.40 |
| HCB                  | 0.300 | 1.36 |
| β-HCH                | 0.430 | 1.91 |
| γ-HCH                | 0.360 | 1.63 |
| δ-HCH                | 0.410 | 1.82 |
| Heptachlor           | 0.22  | 0.97 |
| Aldrin               | 0.22  | 0.99 |
| Isodrin              | 0.330 | 1.48 |
| Heptachlor Epoxide A | 0.420 | 1.88 |
| Oxychlordane         | 0.470 | 2.12 |
| Heptachlor Epoxide B | 0.410 | 1.86 |
| γ-Chlordane          | 0.340 | 1.54 |
| o,p'-DDE             | 0.19  | 0.87 |
| Endosulfan I         | 0.270 | 1.21 |
| α-Chlordane          | 0.45  | 2.0  |
| Dieldrin             | 0.230 | 1.03 |
| p,p'-DDE             | 0.27  | 1.20 |
| o,p'-DDD             | 0.20  | 0.91 |
| Endrin               | 0.280 | 1.23 |
| Endosulfan II        | 0.420 | 1.88 |
| p,p'-DDD             | 0.290 | 1.31 |
| o,p'-DDT             | 0.310 | 1.39 |
| p,p'-DDT             | 0.280 | 1.24 |
| Methoxychlor         | 0.320 | 1.44 |
| Mirex                | 0.410 | 1.84 |

**Table 4.** Average concentrations and range in muscle and liver samples of *Pontoporia blainvillei* (n=9)

| Compounds | Muscle        |              | Liver         |                |
|-----------|---------------|--------------|---------------|----------------|
|           | Average ± SD  | Range        | Average ± SD  | Range          |
| HCB       | <MQL          | <MQL         | 2.97 ± 1.48   | 2.11 - 6.01    |
| β-HCH     | <MQL          | <MQL         | 5.80 ± 2.46   | 2.84 - 10.09   |
| γ-HCH     | 1.77 ± 1.01   | 1.64 - 3.00  | 5.04 ± 1.71   | 3.48 - 9.14    |
| p,p'-DDE  | 29.97 ± 17.58 | 13.69- 40.19 | 86.38 ± 33.26 | 42.56 - 120.58 |
| p,p'-DDD  | 1.88 ± 2.08   | <MQL- 5.72   | 2.64 ± 1.95   | <MQL- 5.91     |
| Mirex     | 3.02 ± 2.43   | 1.93 - 7.29  | 4.51 ± 2.15   | 2.12 - 8.67    |

SD: standard deviation
